# Supplementary material for: HSV-1 ICP0 Dimer Domain Adopts a Novel β-barrel Fold
Source: PubMed Central journal article supplement — bioRxiv. 2024 Jan 16:2024.01.16.575752. Preprint. [Version 1] doi: 10.1101/2024.01.16.575752 (PMC10827139; doi:10.1101/2024.01.16.575752), 2024-01-16
Supplement: media-1.pdf [file media-1.pdf]

|                                                          | ICP0 LE                   | ICP0 HE                   | His-ICP0                  |
|----------------------------------------------------------|---------------------------|---------------------------|---------------------------|
| <b>Data Collection</b>                                   |                           |                           |                           |
| Unit-cell parameters (Å,<br>°)                           | $a=b=96.60,$<br>$c=75.33$ | $a=b=95.91,$<br>$c=74.53$ | $a=b=95.15,$<br>$c=76.72$ |
| Space group                                              | $P4_12_12$                | $P4_12_12$                | $P4_12_12$                |
| Resolution (Å) <sup>†</sup>                              | 46.36-3.00<br>(3.18-3.00) | 47.95-2.65<br>(2.78-2.65) | 43.45-2.45<br>(2.55-2.45) |
| Wavelength (Å)                                           | 1.5895                    | 1.0000                    | 1.0000                    |
| Temperature (K)                                          | 100                       | 100                       | 100                       |
| Observed reflections                                     | 171,401                   | 134,156                   | 89,786                    |
| Unique reflections                                       | 7,423                     | 10,603                    | 14,026                    |
| $\langle I/(\sigma I) \rangle^{\dagger}$                 | 13.1 (1.7)                | 14.6 (1.9)                | 13.1 (1.6)                |
| Completeness (%) <sup>†</sup>                            | 98.0 (100)                | 100 (99.9)                | 99.9 (100)                |
| Multiplicity <sup>†</sup>                                | 23.1 (24.9)               | 12.7 (13.4)               | 6.4 (6.3)                 |
| $R_{\text{merge}} (\%)^{\dagger, \ddagger}$              | 27.6 (263.8)              | 12.3 (145.2)              | 11.3 (92.6)               |
| $R_{\text{meas}} (\%)^{\dagger, \P}$                     | 28.2 (269.3)              | 12.8 (150.7)              | 12.4 (101.2)              |
| $R_{\text{pim}} (\%)^{\dagger, \P}$                      | 5.8 (53.6)                | 3.6 (41.0)                | 4.8 (40.2)                |
| CC <sub>1/2</sub> <sup>†, \ \ </sup>                     | 0.997 (0.749)             | 0.999<br>(0.862)          | 0.998<br>(0.714)          |
| DelAnom CC <sup>#</sup>                                  | 0.333                     | 0.067                     |                           |
| <b>Refinement</b>                                        |                           |                           |                           |
| Resolution (Å) <sup>†</sup>                              |                           | 34.73-2.65                | 43.45-2.45                |
| Reflections<br>(working/test) <sup>†</sup>               |                           | 10,033/511                | 13,323/667                |
| $R_{\text{factor}} / R_{\text{free}} (\%)^{\dagger, \S}$ |                           | 21.8/28.8                 | 19.2/25.4                 |
| No. of atoms<br>(Protein/Iodide/water)                   |                           | 1,684/2/-                 | 1,743/3/42                |
| <b>Model Quality</b>                                     |                           |                           |                           |
| R.m.s deviations                                         |                           |                           |                           |
| Bond lengths (Å)                                         |                           | 0.009                     | 0.009                     |
| Bond angles (°)                                          |                           | 1.136                     | 0.991                     |
| Average $B$ -factor (Å <sup>2</sup> )                    |                           |                           |                           |
| All Atoms                                                |                           | 71.2                      | 44.8                      |
| Protein                                                  |                           | 71.2                      | 44.8                      |
| Iodide                                                   |                           | 106.42                    | 58.5                      |
| Water                                                    |                           | -                         | 42.2                      |
| Coordinate error<br>(maximum likelihood)<br>(Å)          |                           | 0.35                      | 0.34                      |

| Ramachandran Plot        |      |      |
|--------------------------|------|------|
| Most favored (%)         | 97.7 | 97.8 |
| Additionally allowed (%) | 2.3  | 2.2  |

**Supplemental Table 1:** Crystallographic data for ICPO.

† Values in parenthesis are for the highest resolution shell.

‡  $R_{\text{merge}} = \sum_{hkl} |I_i(hkl) - \langle I(hkl) \rangle| / \sum_{hkl} I_i(hkl)$ , where  $I_i(hkl)$  is the intensity measured for the  $i$ th reflection and  $\langle I(hkl) \rangle$  is the average intensity of all reflections with indices  $hkl$ .

§  $R_{\text{factor}} = \sum_{hkl} | |F_{\text{obs}}(hkl)| - |F_{\text{calc}}(hkl)| | / \sum_{hkl} |F_{\text{obs}}(hkl)|$ ; Rfree is calculated in an identical manner using 5% of randomly selected reflections that were not included in the refinement.

¶  $R_{\text{meas}} =$  redundancy-independent (multiplicity-weighted)  $R_{\text{merge}}^{1,2}$ .  $R_{\text{pim}} =$  precision-indicating (multiplicity-weighted)  $R_{\text{merge}}^{3,4}$ .

||  $CC_{1/2}$  is the correlation coefficient of the mean intensities between two random half-sets of data<sup>5,6</sup>.

# DelAnom CC is the correlation coefficient between the Bijvoet differences ( $I_{(hkl)} - I_{(-h-k-l)}$ ) from two random half-sets of data<sup>1</sup> and is used to estimate the anomalous signal strength.

| $\beta$ -strand group | Residue N-Atom | Residue O-Atom | Distance (Å) |      |
|-----------------------|----------------|----------------|--------------|------|
| $\beta$ G1            | Y643           | L747           | 2.96         |      |
|                       | L644           | V653           | 2.91         |      |
|                       | I646           | S651           | 3.01         |      |
|                       | L653           | L644           | 2.85         |      |
|                       | M734           | G738           | 2.83         |      |
|                       | G738           | M734           | 2.69         |      |
|                       | M740           | L732           | 2.84         |      |
|                       | L741           | V748           | 2.76         |      |
|                       | D743           | T746           | 2.79         |      |
|                       | T746           | D743           | 2.82         |      |
|                       | V748           | L741           | 2.95         |      |
|                       | $\beta$ G2     | D666           | L684         | 2.98 |
|                       |                | L668           | V682         | 2.77 |
| I670                  |                | A680           | 2.92         |      |
| D672                  |                | N677           | 3.06         |      |
| G676                  |                | D672           | 2.84         |      |
| V682                  |                | L668           | 2.84         |      |
| L684                  |                | D666           | 2.88         |      |
| $\beta$ G3            | H715           | R759           | 2.99         |      |
|                       | T717           | R757           | 2.74         |      |
|                       | R759           | H715           | 2.87         |      |

**Supplemental Table 2:** Backbone hydrogen bond interactions in the  $\beta$ -strand regions of the ICPO C-terminal dimer domain.

| <b>Subunit: AB<br/>Residue/Atom</b> | <b>Subunit: CD<br/>Residue/Atom</b> | <b>Distance<br/>(Å)</b> |
|-------------------------------------|-------------------------------------|-------------------------|
| A: S731/N                           | D: N739/OD1                         | 2.8                     |
| A: W733/N                           | D: M740/O                           | 2.84                    |
| A: G745/N                           | D: S650/OG                          | 2.68                    |
| B: T735/N                           | C: N730/OD1                         | 2.98                    |
| B: M740/N                           | C: S731/O                           | 3.08                    |
| B: F742/N                           | C: W733/O                           | 3.01                    |
| B: Q744/N                           | D: E674/OE2                         | 2.87                    |
| B: N739/OD1                         | C: S739/N                           | 2.8                     |
| B: M740/O                           | C: W733/N                           | 2.84                    |
| B: S650/OG                          | C: G745/N                           | 2.68                    |
| A: N730/OD1                         | D: T735/N                           | 2.98                    |
| A: S731/O                           | D: M740/N                           | 3.08                    |
| A: W733/O                           | D: F742/N                           | 3.01                    |
| B: E764/OE2                         | D: Q744/N                           | 2.87                    |

**Supplemental Table 3:** Hydrogen bond interactions between subunits in the ICPO tetramer (dimer of dimers). Highlighted interactions occur between the  $\beta$ 6- $\beta$ 7 strands.

**A**

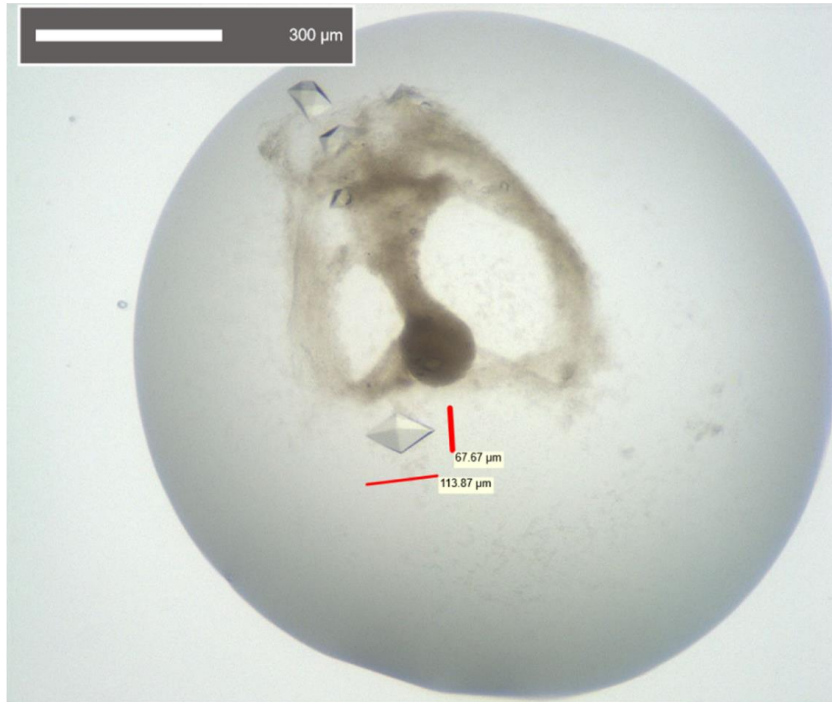

**B**

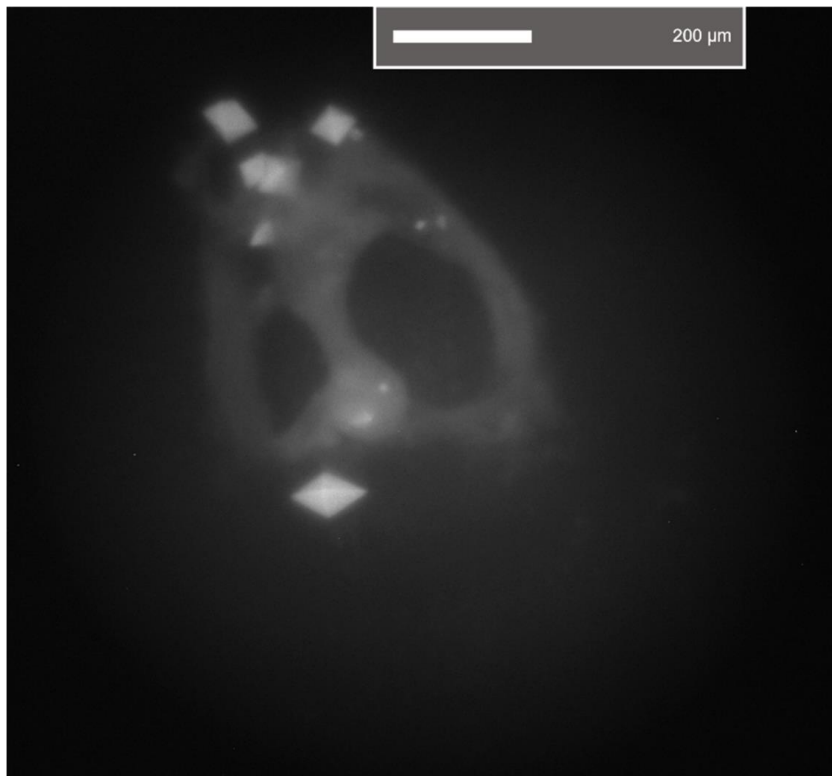

**Supplemental Figure 1: Crystals of ICPO. A)** Visible light image and **B)** UV fluorescence image.

ICP0\_Human\_alphaherpesvirus\_1/1-776     S E W N S L W M T P V G N M L F D Q G - - - - - T L V G A L D F R S L R S R H P W S G E Q G A S T R D E G K Q  
 ICP0\_Chimpanzee\_alphaherpesvirus/1-810     S E W N S L W M T P V G N M L F D Q G - - - - - T L V G A L D F H S L R S R H P W S L E Q G A P A P A G D A P  
 ICP0\_Human\_alphaherpesvirus\_2/1-833     S E W N S L W M T P V G N M L F D Q G - - - - - T L V G A L D F H G L R S R H P W S R E Q G A P A P A G D A P  
 ICP0\_Macacine\_alphaherpesvirus\_1/1-691     - - - H G L W M T P V G G M L F D Q G - - - - - A L L G G R S F H S L D S R H P W T P G P A D P P P T R G S G  
 ICP0\_Cercopithecine\_alphaherpesvirus\_2/1-709     - - - H G L W M T P V G G M L F E Q G - - - - - A L L G G R S F H S L D S R H P W T P A E G D P - - - - -  
 ICP0\_Papiine\_alphaherpesvirus\_2/1-713     - - - H G L W M T P V G G L L F D Q G - - - - - T L L G G R S F H S L D S R H P W T P D P A G P P S A R D A D  
 ICP0\_Saimiriine\_alphaherpesvirus\_1/1-729     S T V K N T - - - A G A V F F T P G G R S E G Y R L R G P L V A A S K N A - - - S T Q V P A T Q K L S G - - -  
 ICP0\_Ateline\_alphaherpesvirus\_1/1-773     E G L Q N V T A S P A G A L F A P G G Y P D G Y L L G G T M V D A R Q G T P G R G S A G G A T E E T A G P A H

**Supplemental Figure 2:** Alignment of ICP0 CTD tetramer interface residues of unique herpesvirus species containing the CTD. The numbering is relative to the HSV-1 ICP0.

KOS/1-776     G P R G P R K C A R K T R H A E T S G A V P A G G L T R Y L P I S G V S S V V A L S P Y V N K T I T G D C L P I L D M E T G N I G A Y V V L V D Q T G N M A T  
 S17/1-775     G P R G P R K C A R K T R H A E T S G A V P A G G L T R Y L P I S G V S S V V A L S P Y V N K T I T G D C L P I L D M E T G N I G A Y V V L V D Q T G N M A T  
 McKrae/1-775     G P R G P R K C A R K T R H A E T S G A V P A G G L T R Y L P I S G V S S V V A L S P Y V N K T I T G D C L P I L D M E T G N I G A Y V V L V D Q T G N M A T  
 H129/1-777     G P R G P R K C A R K T R H A E T S G A A P A G G L T R Y L P I S G V S S V V A L S P Y V N K T I T G D C L P I L D M E T G N I G A Y V V L V D Q T G N M A T  
 E22/1-776     G P R G P R K C A R K T R H A E T S G A A P V G G L T R Y L P I S G V S S V V A L S P Y V N K T I T G D C L P I L D M E T G N I G A Y V V L V D Q T G N M A T  
 S23/1-773     G P R G P R K C A R K T R H A E T S G A A P A G G L T R Y L P I S G V S S V V A L S P Y V N K T I T G D C L P I L D M E T G N I G A Y V V L V D Q T G N M A T  
 E14/1-776     G P R G P R K C A R K T R H A E T S G A A P A G G L T R Y L P I S G V S S V V A L S P Y V N K T I T G D C L P I L D M E T G N I G A Y V V L V D Q T G N M A T  
 E08/1-772     G P R G P R K C A R K T R H A E T S G A V P A G G L T R Y L P I S G V S S V V A L S P Y V N K T I T G D C L P I L D M E T G N I G A Y V V L V D Q T G N M A T  
 E35/1-776     G P R G P R K C A R K T R H A E T S G A A P A G G L T R Y L P I S G V S S V V A L S P Y V N K T I T G D C L P I L D M E T G N I G A Y V V L V D Q T G N M A T  
 RE/1-774     G P R G P R K C A R K T R H A E T S G A V P A G G L T R Y L P I S G V S S V V A L S P Y V N K T I T G D C L P I L D M E T G N I G A Y V V L V D Q T G N M A T  
 HSV-1/0116209/India/2011/1-776     G P R G P R K C A R K T R H A E T S G A V P A G G L T R Y L P I S G V S S V V A L S P Y V N K T I T G D C L P I L D M E T G N I G A Y V V L V D Q T G N M A T  
 172\_2010/1-783     G P R G P R K C A R K T R H A E T S G A V P A G G L T R Y L P I S G V S S V V A L S P Y V N K T I T G D C L P I L D M E T G N I G A Y V V L V D Q T G N M A T  
 2158\_2007/1-775     G P R G P R K C A R K T R H A E T S G A V P A G G L T R Y L P I S G V S S V V A L S P Y V N K T I T G D C L P I L D M E T G N I G A Y V V L V D Q T G N M A T  
 3083\_2008/1-776     G P R G P R K C A R K T R H A E T S G A V P A G G L T R Y L P I S G V S S V V A L S P Y V N K T I T G D C L P I L D M E T G N I G A Y V V L V D Q T G N M A T  
 1319\_2005/1-776     G P R G P R K C A R K T R H A E T S G A V P A G G L T R Y L P I S G V S S V V A L S P Y V N K T I T G D C L P I L D M E T G N I G A Y V V L V D Q T G N M A T  
 270\_2007/1-776     G P R G P R K C A R K T R H A E T S G A V P A G G L T R Y L P I S G V S S V V A L S P Y V N K T I T G D C L P I L D M E T G N I G A Y V V L V D Q T G N M A T

KOS/1-776     R L R A A V P G W S R R T L L P E T A G N H V T P P E Y P T A P A S E W N S L W M T P V G N M L F D Q G T L V G A L D F R S L R S R H P W S G E Q G A S T R D E G K Q  
 S17/1-775     R L R A A V P G W S R R T L L P E T A G N H V M P P E Y P T A P A S E W N S L W M T P V G N M L F D Q G T L V G A L D F R S L R S R H P W S G E Q G A S T R D E G K Q  
 McKrae/1-775     R L R A A V P G W S R R T L L P E T A G N H V M P P E Y P T A P A S E W N S L W M T P V G N M L F D Q G T L V G A L D F R S L R S R H P W S G E Q G A S T R D E G K Q  
 H129/1-777     R L R A A V P G W S R R T L L P E T A G N H V M P P E Y P T A P A S E W N S L W M T P V G N M L F D Q G T L V G A L D F R S L R S R H P W S G E Q G A S T R D E G K Q  
 E22/1-776     R L R A A V P G W S R R T L L P E T A G N H V M P P E Y P T A P A S E W N S L W M T P V G N M L F D Q G T L V G A L D F R S L R S R H P W S G E Q G A S T R D E G K Q  
 S23/1-773     R L R A A V P G W S R R T L L P E T A G N H V M P P E Y P T A P A S E W N S L W M T P V G N M L F D Q G T L V G A L D F R S L R S R H P W S G E Q G A S T R D E G K Q  
 E14/1-776     R L R A A V P G W S R R T L L P E T A G N H V T P P E Y P T A P A S E W N S L W M T P V G N M L F D Q G T L V G A L D F R S L R S R H P W S G E Q G A S T R D E G K Q  
 E08/1-772     R L R A A V P G W S R R T L L P E T A G N H V M P P E Y P T A P A S E W N S L W M T P V G N M L F D Q G T L V G A L D F R S L R S R H P W S G E Q G A S T R D E G K Q  
 E35/1-776     R L R A A V P G W S R R T L L P E T A G N H V M P P E Y P T A P A S E W N S L W M T P V G N M L F D Q G T L V G A L D F R S L R S R H P W S G E Q G A S T R D E G K Q  
 RE/1-774     R L R A A V P G W S R R T L L P E T A G N H V T P P E Y P T A P A S E W N S L W M T P V G N M L F D Q G T L V G A L D F R S L R S R H P W S G E Q G A S T R D E G K Q  
 HSV-1/0116209/India/2011/1-776     R L R A A V P G W S R R T L L P E T A G N H V T P P E Y P T A P A S E W N S L W M T P V G N M L F D Q G T L V G A L D F R S L R S R H P W S G E Q G A S T R D E G K Q  
 172\_2010/1-783     R L R A A V P G W S R R T L L P E T A G N H V M P P E Y P T A P A S E W N S L W M T P V G N M L F D Q G T L V G A L D F R S L R S R H P W S G E Q G A S T R D E G K Q  
 2158\_2007/1-775     R L R A A V P G W S R R T L L P E T A G N H V T P P E Y P T A P A S E W N S L W M T P V G N M L F D Q G T L V G A L D F R S L R S R H P W S G E Q G A S T R D E G K Q  
 3083\_2008/1-776     R L R A A V P G W S R R T L L P E T A G N H V T P P E Y P T A P A S E W N S L W M T P V G N M L F D Q G T L V G A L D F R S L R S R H P W S G E Q G A S T R D E G K Q  
 1319\_2005/1-776     R L R A A V P G W S R R T L L P E T A G N H V T P P E Y P T A P A S E W N S L W M T P V G N M L F D Q G T L V G A L D F R S L R S R H P W S G E Q G A S T R D E G K Q  
 270\_2007/1-776     R L R A A V P G W S R R T L L P E T A G N H V T P P E Y P T A P A S E W N S L W M T P V G N M L F D Q G T L V G A L D F R S L R S R H P W S G E Q G A S T R D E G K Q

**Supplemental Figure 3:** Alignment of full ICP0 CTD of HSV-1 strains and clinical isolates. The full ICP0 CTD of various HSV-1 strains and clinical isolates. The numbering is relative to the HSV-1 ICP0 KOS strain.

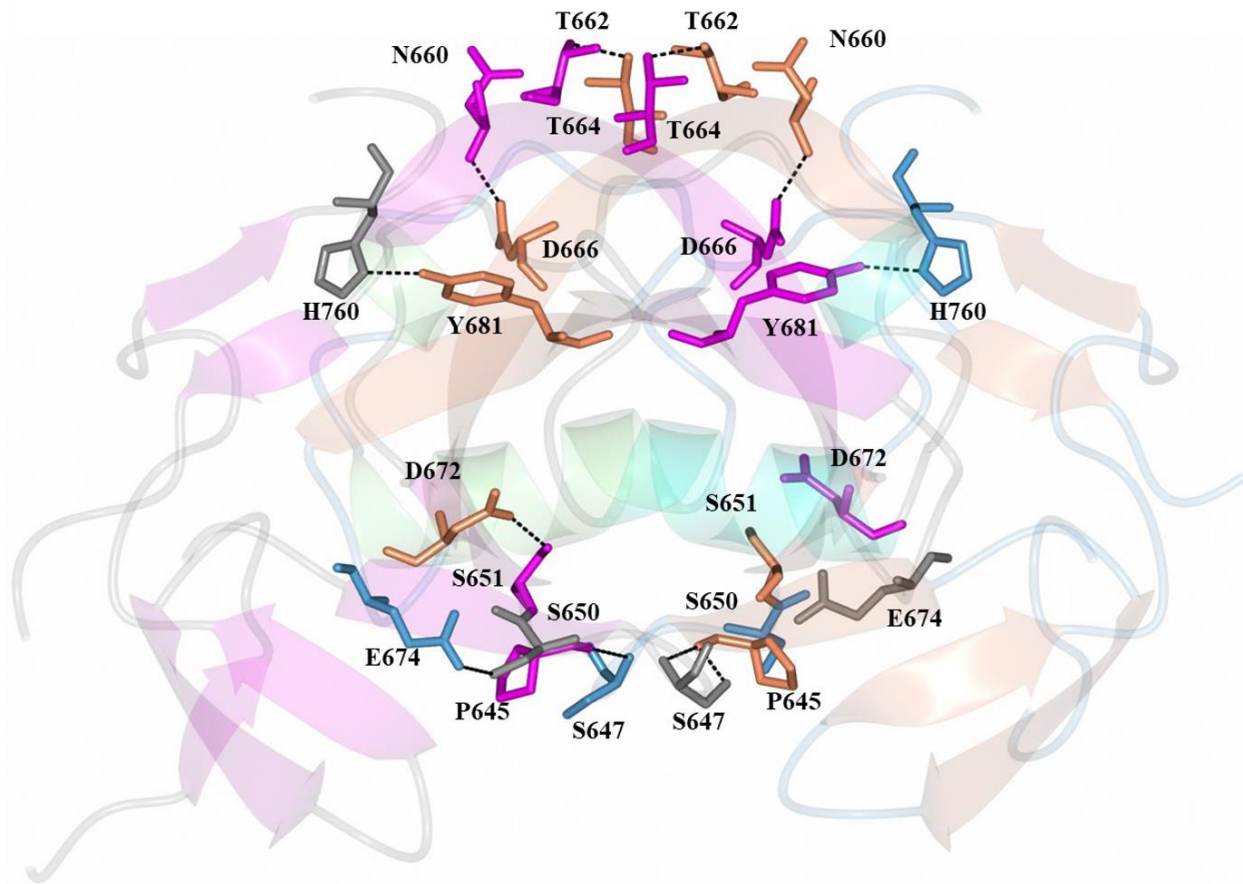

**Supplemental Figure 4:** Side chain hydrogen bond interaction between subunits (dashed lines). Subunit A helices (cyan),  $\beta$ -strands (magenta) and loops (gray). Subunit B helices (green),  $\beta$ -strands (tan) and loops (blue).

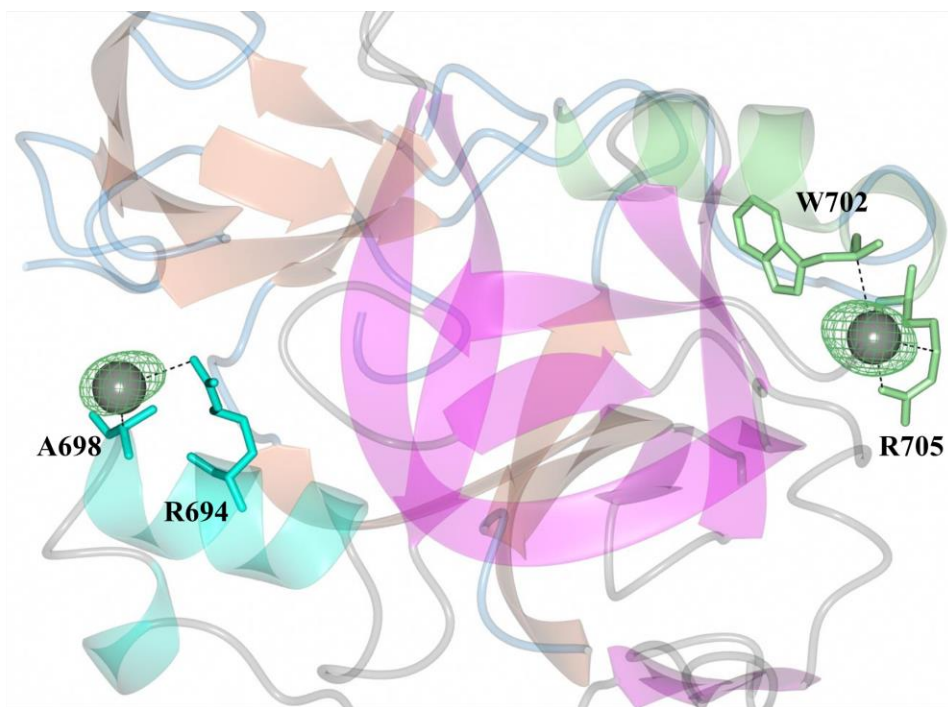

**Supplemental Figure 5:** Phased anomalous difference map (green mesh) contoured at 3 showing the positions of the iodide ions (gray spheres). The dashed lines indicated close contacts between 3.6-3.9 Å.

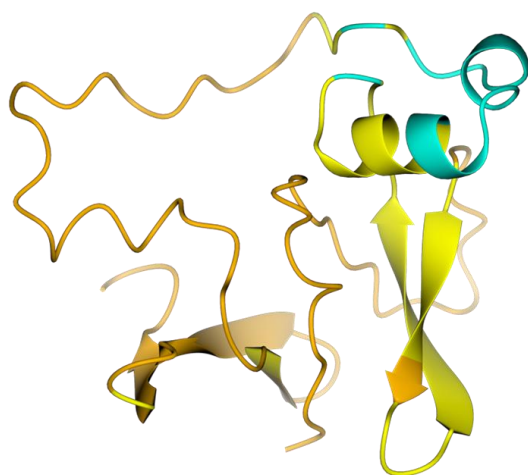

**Supplemental Figure 6:** Alphafold model of the monomeric ICPO CTD. The Alphafold model of the ICPO CTD is shown in ribbons, colored by the pLDDT (confidence): confident (cyan,  $90 > \text{pLDDT} > 70$ ), low (yellow,  $70 > \text{pLDDT} > 50$ ), and very low (orange,  $\text{pLDDT} < 50$ ).



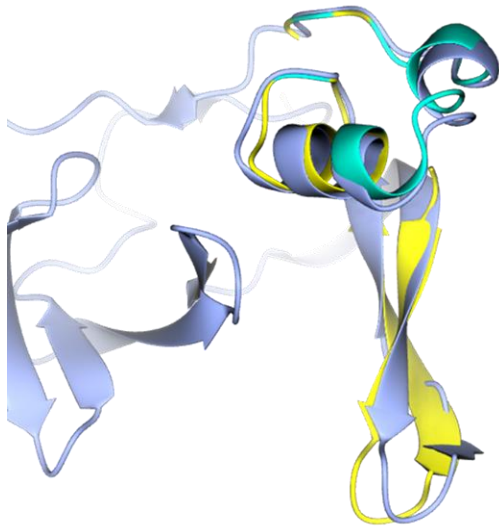

**Supplemental Figure 7:** The region of the AlphaFold model of the monomeric ICPO CTD with low or moderate confidence recapitulates the monomeric structure. The AlphaFold model of the ICPO CTD with pLDDT > 50 is shown in ribbons (cyan, 90 > pLDDT > 70 vs yellow, 70 > pLDDT > 50). A single chain of the ICPO CTD is shown in silver.

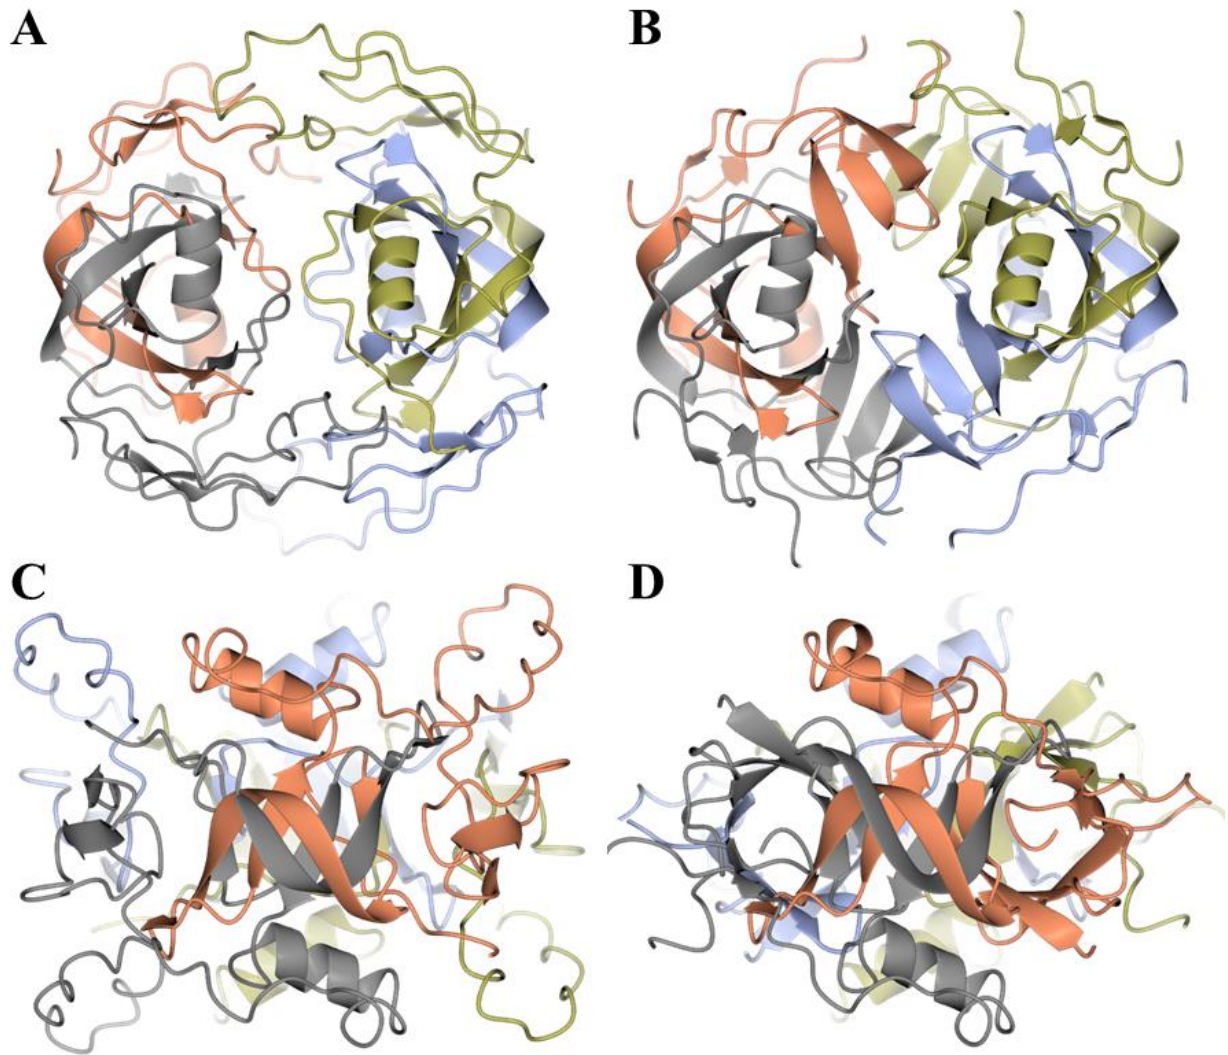

**Supplemental Figure 8:** AlphaFold model of the tetrameric ICP0 CTD compared to the solved structure. The AlphaFold model of the ICP0 CTD tetramer is shown in ribbons on the left (**A and C**), while the crystal structure is shown on the right (**B and D**), colored by the chain. The dimeric interface, particularly the twisted  $\beta$ -strands, were modeled accurately (**A and B**). However, generally none of the strands comprising the stacked barrels were modeled (**C and D**).

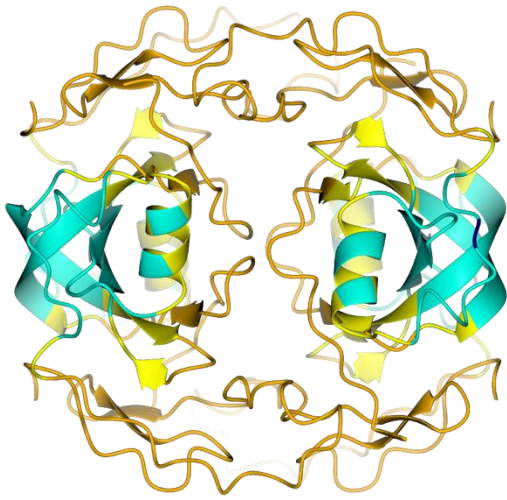

**Supplemental Figure 9:** Confidence of the AlphaFold model of the tetrameric ICPO CTD. The AlphaFold model of the ICPO CTD is shown in ribbons, colored by the pLDDT (confidence): confident (cyan,  $90 > \text{pLDDT} > 70$ ), low (yellow,  $70 > \text{pLDDT} > 50$ ), and very low (orange,  $\text{pLDDT} < 50$ ).

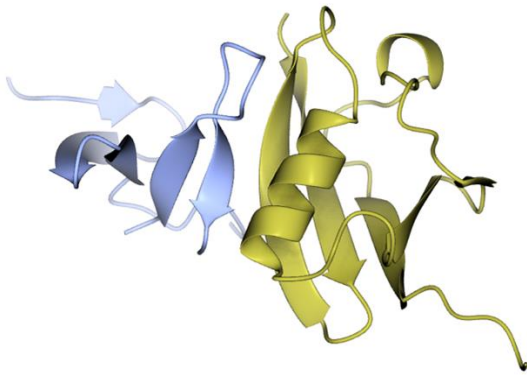

**Supplemental Figure 10:** A model of SUMO binding anti-parallel to ICPO at SLS5. A folded subdomain containing SLS5 is shown in silver ribbons, while SUMO is represented by gold ribbons.

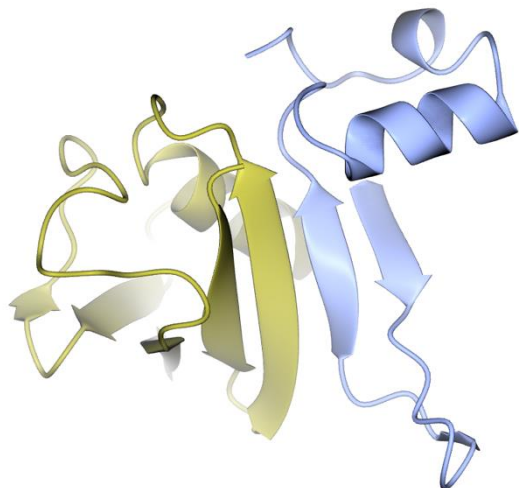

**Supplemental Figure 11:** A model of SUMO binding parallel to ICPO at SLS7. A folded subdomain containing SLS7 is shown in silver ribbons, while SUMO is represented by gold ribbons.

## REFERENCES

1. Evans PR. An introduction to data reduction: space-group determination, scaling and intensity statistics. *Acta Crystallogr D Biol Crystallogr*. Apr 2011;67(Pt 4):282-92. doi:10.1107/S090744491003982X
2. Evans P. Scaling and assessment of data quality. *Acta Crystallogr D Biol Crystallogr*. Jan 2006;62(Pt 1):72-82. doi:10.1107/S0907444905036693
3. Diederichs K, Karplus PA. Improved R-factors for diffraction data analysis in macromolecular crystallography. *Nat Struct Biol*. Apr 1997;4(4):269-75. doi:10.1038/nsb0497-269
4. Weiss MS. Global indicators of X-ray data quality. *Journal of Applied Crystallography*. 2001;34:130-135. doi:10.1107/S0021889800018227
5. Karplus PA, Diederichs K. Linking crystallographic model and data quality. *Science*. May 25 2012;336(6084):1030-3. doi:10.1126/science.1218231
6. Evans P. Biochemistry. Resolving some old problems in protein crystallography. *Science*. May 25 2012;336(6084):986-7. doi:10.1126/science.1222162
